# Supplementary material
Source: MDPI journal article supplement (https://www.mdpi.com/2072-4292/11/15/1740)
Supplement: s1 [file s1]

**Constructing a finer-resolution forest height in China using ICESat/GLAS,  
Landsat and ALOS PALSAR data and height patterns of natural forests and  
plantations**

Huabing Huang, Caixia Liu, Xiaoyi Wang

Table S1. List of the 50 ecozones in China

| Code | Name                                                                                           |
|------|------------------------------------------------------------------------------------------------|
| 1    | Northern Daxing'anling deciduous conifer forest ecological zone                                |
| 2    | Xiaoxing'anling mountain conifer and broadleaf mixed forest ecological zone                    |
| 3    | Sanjiang Plain agriculture and wetland ecological region                                       |
| 4    | Mountain conifer and broadleaf mixed forest ecological zone in the Changbai-Qianshan mountains |
| 5    | The eastern part of the Northeast Plain agricultural ecological zone                           |
| 6    | Western Northeast Plain meadow and grassland ecological zone                                   |
| 7    | South Central Daxing'anling coniferous broadleaf forest and forest grassland ecological zone   |
| 8    | Liaodong-Shandong hill deciduous broadleaf forest ecological zone                              |
| 9    | Beijing-Tianjin-Tangshan towns and suburbs agricultural ecological zone                        |
| 10   | Mountain deciduous broadleaf forest ecological zone in Yanshan-Taihang mountain                |
| 11   | Fenwei Basin agricultural ecological zone                                                      |
| 12   | Loess Plateau agriculture and grassland ecological zone                                        |
| 13   | North China Plain agricultural ecological zone                                                 |
| 14   | Huaiyang hill evergreen broadleaf forest ecological zone                                       |
| 15   | Qinba mountain deciduous and evergreen broadleaf forest ecological zone                        |
| 16   | Yangtze River Delta towns and suburbs agricultural ecological zone                             |
| 17   | Plain agricultural ecological zone in the middle and lower reaches of the Yangtze River        |
| 18   | Ecological zone in the Three Gorges Reservoir                                                  |
| 19   | Agriculture and forest mixed ecological zone in the Sichuan Basin                              |

- 
- |    |                                                                                                                  |
|----|------------------------------------------------------------------------------------------------------------------|
| 20 | Mountain evergreen broadleaf forest ecological zone in Tianmu–Huaiyushan mountains                               |
| 21 | Zhejiang-Fujian mountain and hill evergreen broadleaf forest ecological zone                                     |
| 22 | Hunan-Jiangxi hill and mountain evergreen broadleaf forest ecological zone                                       |
| 23 | Wuling-Xuefeng mountain evergreen broadleaf forest ecological zone                                               |
| 24 | Evergreen broadleaf ecological zone in karst areas of central Guizhou                                            |
| 25 | Mountain evergreen broadleaf forest ecological zone in southwest Sichuan and north Yunnan                        |
| 26 | Nanling mountain and hill evergreen broadleaf forest ecological zone                                             |
| 27 | Evergreen broadleaf ecological zone in northern Taiwan                                                           |
| 28 | Central Yunan-Guangxi-Guangdong and southern Fujian mountain and hill evergreen broadleaf forest ecological zone |
| 29 | Towns and suburbs agriculture ecological zone in the Pearl River Delta                                           |
| 30 | Tropical monsoon forest and rainforest ecological zone in southern Taiwan                                        |
| 31 | Tropical monsoon forest and rainforest ecological zone in southern Yunan-Guangxi-Guangdong                       |
| 32 | Tropical agriculture ecological zone around the Hainan island                                                    |
| 33 | Mountain tropical rainforest and monsoon forest ecological zone in central Hainan                                |
| 34 | Typical grassland ecological zone in the middle and east of Inner Mongolia Plateau                               |
| 35 | Desert grassland ecological zone in the central Inner Mongolia Plateau and the Longzhong                         |
| 36 | Grassland desert ecological zone in the central Inner Mongolia Plateau                                           |
| 37 | Mountain desert ecological zone of the west Inner Mongolia Plateau and Beishan                                   |
| 38 | Mountain forest and grassland ecological zone in the Altai and western Junggar                                   |
| 39 | Desert ecological zone in Junggar Basin                                                                          |
| 40 | Mountain forest and grassland ecological zone in the Tianshan                                                    |
| 41 | Desert ecological zone in the Tarim Basin and the eastern Xinjiang                                               |
| 42 | Forest and alpine grassland ecological zone in the Qilian Mountains                                              |
| 43 | Desert ecological zone in the Qaidam Basin                                                                       |
| 44 | Alpine desert grassland ecological zone in the Pamir, the Kunlun and the Altun mountains                         |
| 45 | Alpine meadow steppe ecological zone in the start of Yangtze and Yellow Rivers and Gannan                        |
| 46 | Alpine desert grassland ecological zone in northern Tibet                                                        |
| 47 | Temperate arid desert ecological zone in the Ali mountains                                                       |
| 48 | Cold temperate conifer forest ecological zone in eastern Tibet and western Sichuan                               |
| 49 | Mountain alpine meadow and grassland ecological zone in southern Tibet                                           |
| 50 | Tropical rainforest and monsoon forest ecological zone in southeast Tibet                                        |
-
